# Supplementary material
Source: Springer Nature journal article supplement (https://www.springermedizin.de/resource/supplementary/12891_2010_1144_MOESM7_ESM.pdf/9507786)

# Neck pain

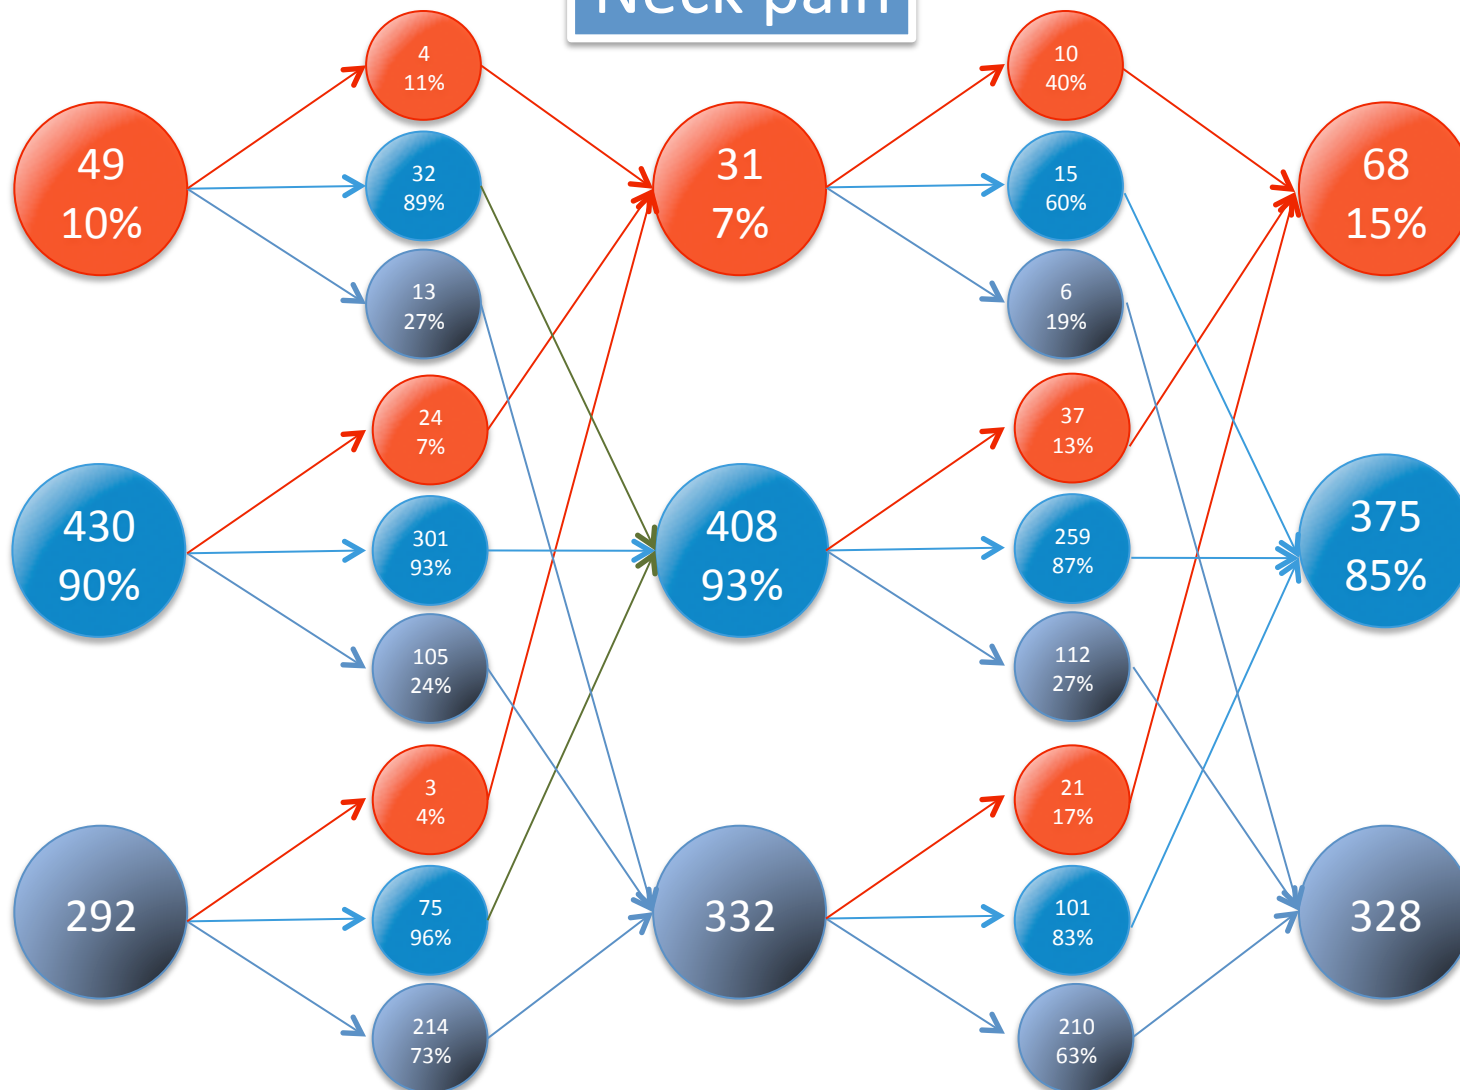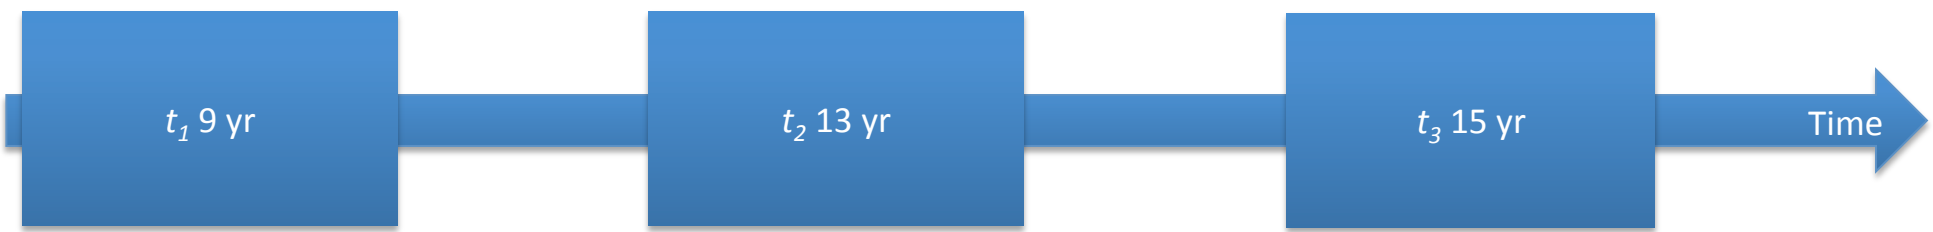

Supplement: MOESM7 [file 9507786]
